# Supplementary material for: Measuring NDC80 binding reveals the molecular basis of tension-dependent kinetochore-microtubule attachments
Source: eLife journal article supplement (doi:10.7554/elife.36392), 2018-07-25
Supplement: supp [file elife-36392-supp-v1.zip]

Archive with 10 entries (10 files):
- elife_poa_e36392_Figure_3_figure_supplement_2.ai
- elife_poa_e36392_Figure_3_figure_supplement_1.ai
- elife_poa_e36392_Figure_1_figure_supplement_1.ai
- elife_poa_e36392_Figure_1_figure_supplement_3.ai
- elife_poa_e36392_Figure_1_figure_supplement_4.pdf
- elife_poa_e36392_Figure_1_figure_supplement_5.pdf
- elife_poa_e36392_Transparent_Reporting_File.pdf
- elife_poa_e36392_Figure_4_figure_supplement_1.ai
- elife_poa_e36392_Figure_1_figure_supplement_2.pdf
- elife_poa_e36392_Figure_5_figure_supplement_1.ai
