# Supplementary material for: Measuring NDC80 binding reveals the molecular basis of tension-dependent kinetochore-microtubule attachments
Source: eLife journal article supplement (doi:10.7554/elife.36392), 2018-07-25

Predict distance  $r_i$  between mTurquoise2 and TC

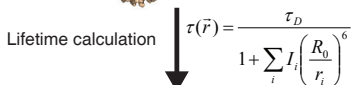

### Lifetime calculation

### Fluorescence decay simulation

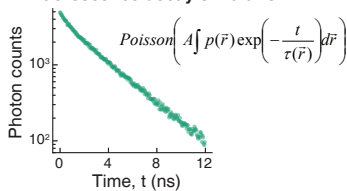

# B

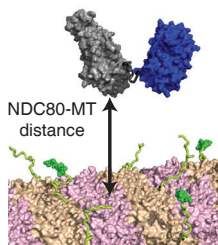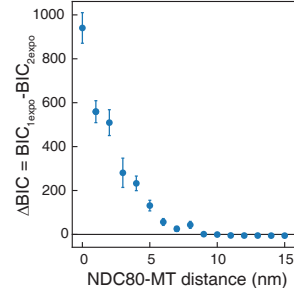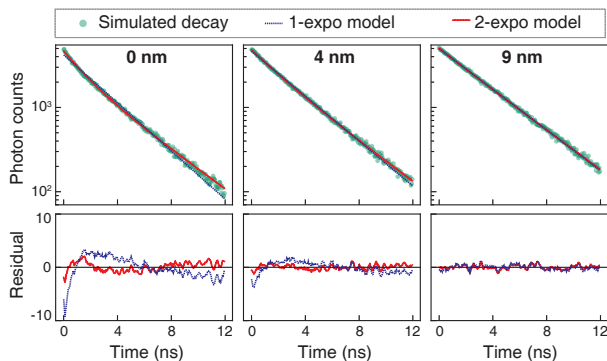

**C**

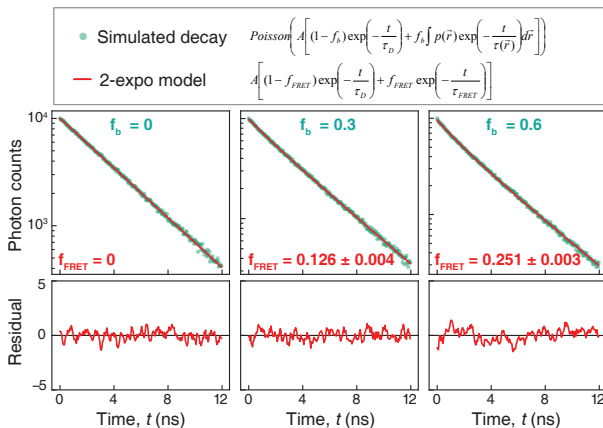

### NDC80-kMT FRET calibration

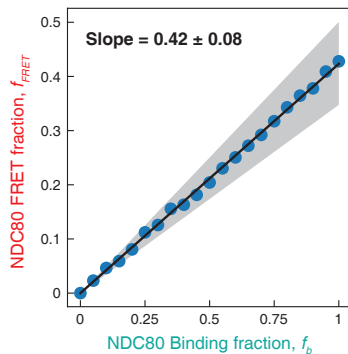

Supplement: supp [file elife-36392-supp-v1.zip › elife_poa_e36392_Figure_1_figure_supplement_5.pdf]
