# Supplementary figures and images for: Measuring NDC80 binding reveals the molecular basis of tension-dependent kinetochore-microtubule attachments
Source: eLife journal article supplement (doi:10.7554/elife.36392), 2018-07-25

**A****FLIM measurement**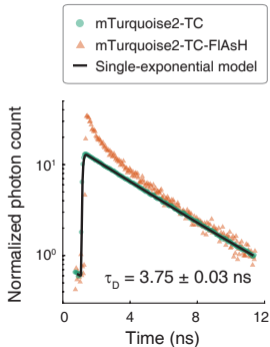**B****Monte Carlo simulation**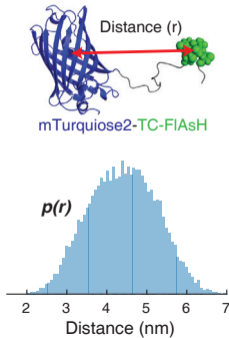**C**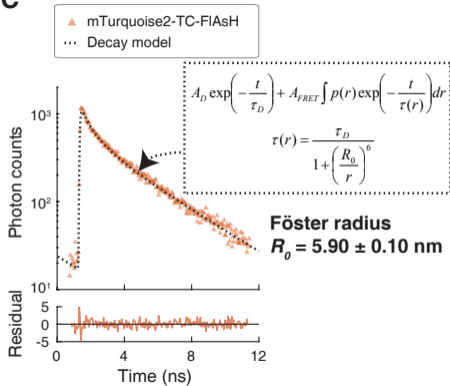

Supplement: supp [file elife-36392-supp-v1.zip › elife_poa_e36392_Figure_1_figure_supplement_4.pdf]

**A**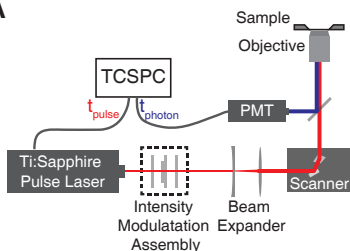**B****No FRET**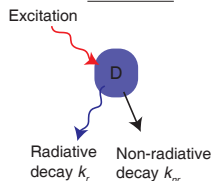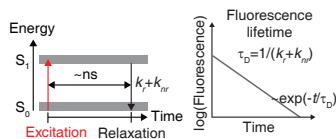**FRET**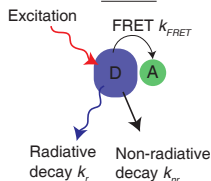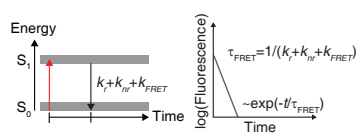**FRET + No FRET**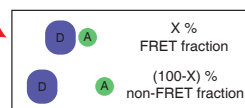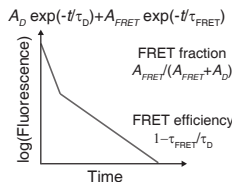**C**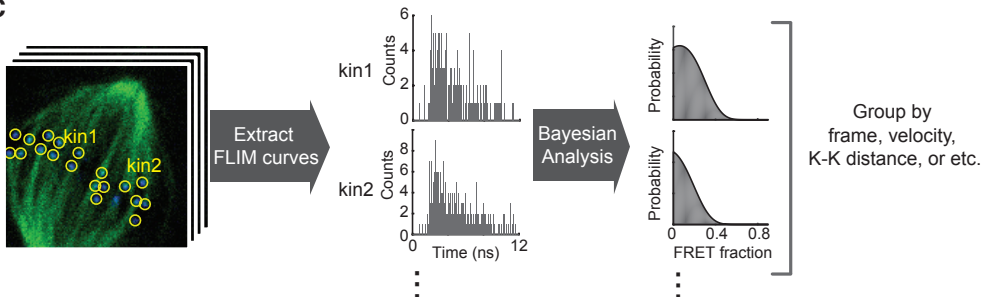

Supplement: supp [file elife-36392-supp-v1.zip › elife_poa_e36392_Figure_1_figure_supplement_2.pdf]
